# Supplementary material for: One-dimensional organic lead halide perovskites with efficient bluish white-light emission
Source: PubMed Central journal article supplement (PMC5216108; doi:10.1038/ncomms14051), 2017-01-04
Supplement: ncomms14051-s1.pdf [file ncomms14051-s1.pdf]

**Supplementary Table 1 | Single crystal X-ray diffraction data of 1D bulk single crystal perovskites.**

|                                   |                                             |                       |
|-----------------------------------|---------------------------------------------|-----------------------|
| Empirical formula                 | C4 H14 Br4 N2 Pb                            |                       |
| Formula weight                    | 617.00                                      |                       |
| Temperature                       | 103(2) K                                    |                       |
| Wavelength                        | 0.71073 Å                                   |                       |
| Crystal system                    | Orthorhombic                                |                       |
| Space group                       | I m m a                                     |                       |
| Unit cell dimensions              | a = 14.6230(16) Å                           | $\alpha = 90^\circ$ . |
|                                   | b = 6.1041(7) Å                             | $\beta = 90^\circ$ .  |
|                                   | c = 14.4070(16) Å                           | $\gamma = 90^\circ$ . |
| Volume                            | 1286.0(2) Å <sup>3</sup>                    |                       |
| Z                                 | 4                                           |                       |
| Density (calculated)              | 3.187 Mg/m <sup>3</sup>                     |                       |
| Absorption coefficient            | 25.504 mm <sup>-1</sup>                     |                       |
| F(000)                            | 1096                                        |                       |
| Crystal size                      | 0.280 x 0.095 x 0.060 mm <sup>3</sup>       |                       |
| Theta range for data collection   | 1.984 to 28.488°.                           |                       |
| Index ranges                      | -18<=h<=19, -7<=k<=8, -19<=l<=19            |                       |
| Reflections collected             | 7142                                        |                       |
| Independent reflections           | 895 [R(int) = 0.0481]                       |                       |
| Completeness to theta = 25.242°   | 99.9 %                                      |                       |
| Absorption correction             | Empirical                                   |                       |
| Max. and min. transmission        | 0.2163 and 0.07491                          |                       |
| Refinement method                 | Full-matrix least-squares on F <sup>2</sup> |                       |
| Data / restraints / parameters    | 895 / 0 / 39                                |                       |
| Goodness-of-fit on F <sup>2</sup> | 1.137                                       |                       |
| Final R indices [I>2sigma(I)]     | R1 = 0.0182, wR2 = 0.0416                   |                       |
| R indices (all data)              | R1 = 0.0185, wR2 = 0.0417                   |                       |
| Extinction coefficient            | 0.00168(9)                                  |                       |
| Largest diff. peak and hole       | 1.068 and -1.161 e.Å <sup>-3</sup>          |                       |

**Supplementary Table 2 | Chemical yield and composition of the component molar ratio in 1D microscale perovskites according to TGA and  $^1\text{H}$  NMR data.**

| Product                | Reagent                       | Starting amount | Molar ratio <sup>a</sup> | Theoretical ratio <sup>b</sup> | Yield |
|------------------------|-------------------------------|-----------------|--------------------------|--------------------------------|-------|
|                        | Octanoic Acid                 | 1.00 mmol       | 0.00                     | 0.00                           |       |
| Microscale Perovskites | N, N'-dimethylethylenediamine | 0.30 mmol       | 1.02                     | 1.00                           | 95 %  |
|                        | PbBr <sub>2</sub>             | 0.10 mmol       | 1.00                     | 1.00                           |       |

<sup>a</sup> Based on  $^1\text{H}$  NMR and TGA data; <sup>b</sup> based on the chemical formula:  $\text{C}_4\text{N}_2\text{H}_{14}\text{PbBr}_4$ .

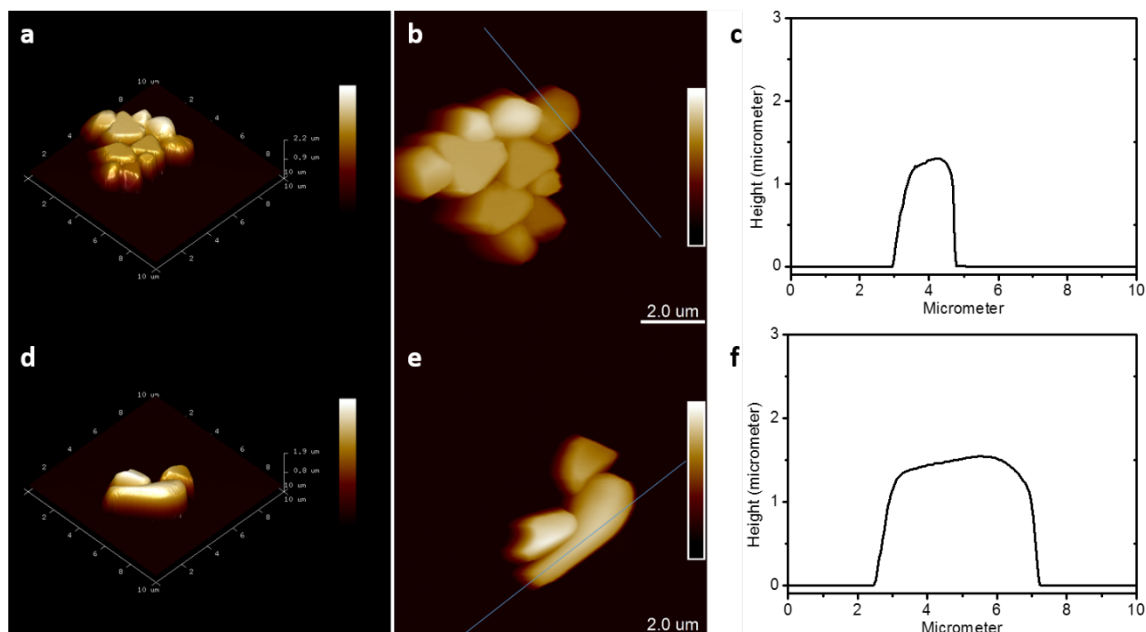

**Supplementary Figure 1 | AFM characterization of the 1D microscale perovskites. a,d, 3D AFM images of  $\text{C}_4\text{N}_2\text{H}_{14}\text{PbBr}_4$  microscale perovskites. b,e, 2D AFM images of the as-prepared microscale perovskites. c,f, Height profile along the blue line in 2D AFM images (b) and (e).**

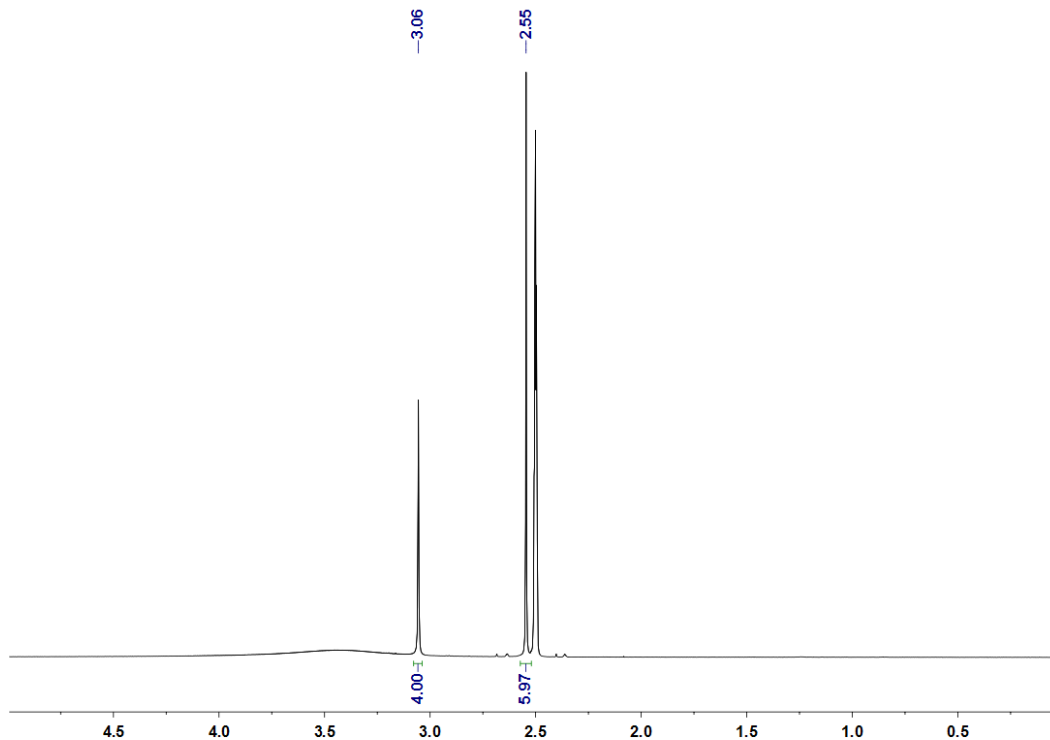

**Supplementary Figure 2 | Proton NMR spectrum of the 1D microscale perovskites in DMSO-d<sub>6</sub>.**

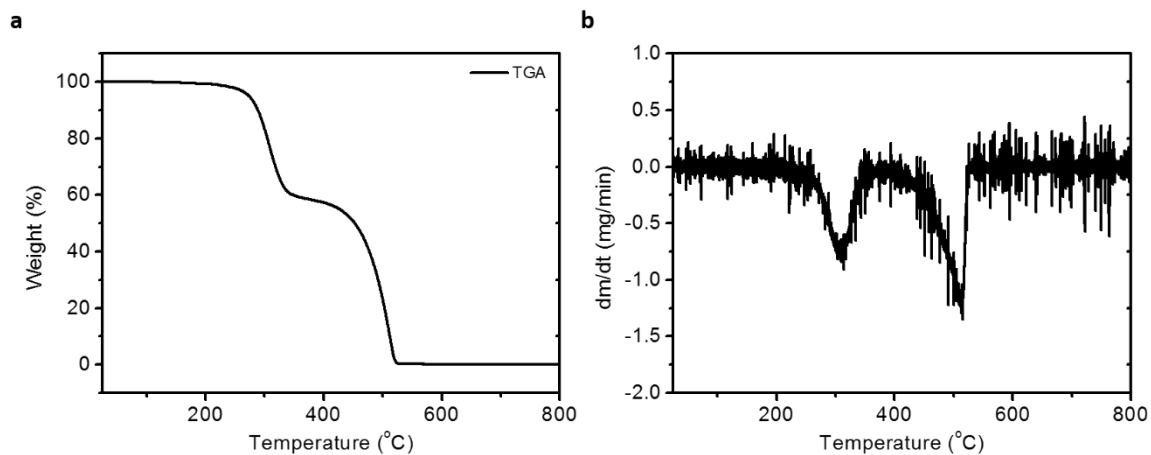

**Supplementary Figure 3 | TGA study of the 1D microscale perovskites. a,** TGA heating curves of  $C_4N_2H_{14}PbBr_4$  microscale perovskites. **b,** The corresponding 1st derivative.

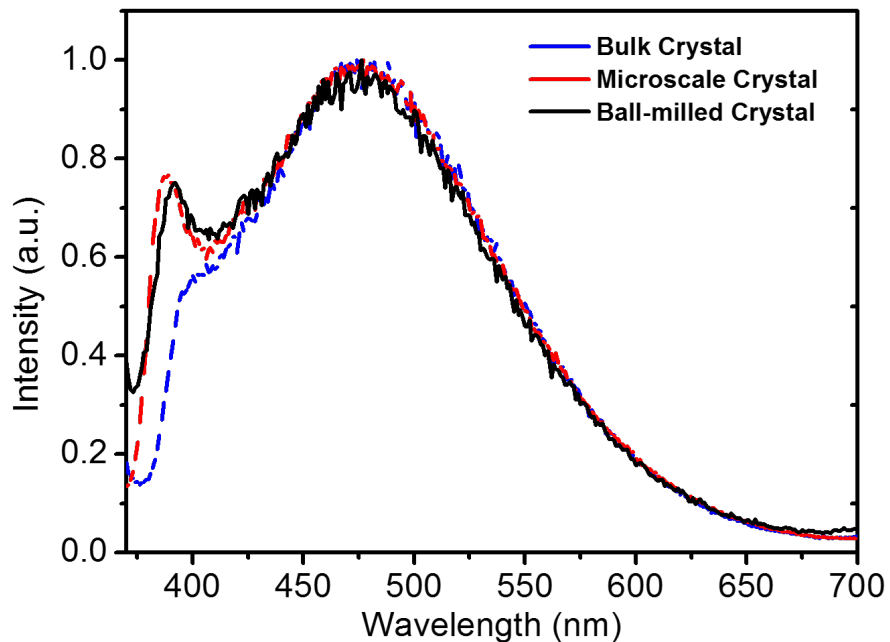

**Supplementary Figure 4 | Emission (excited at 360 nm) spectra of ball-milled bulk crystals, as well as bulk and microscale crystals at room temperature.**

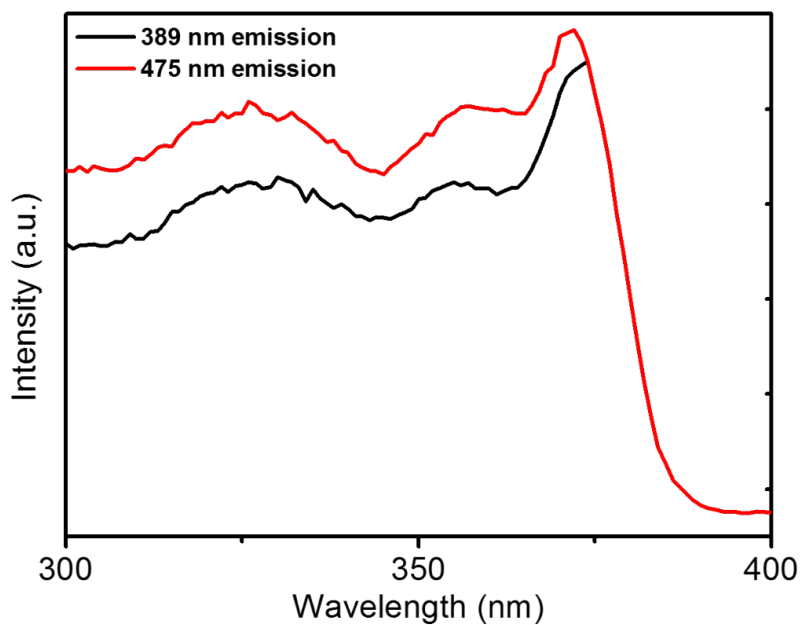

**Supplementary Figure 5 | Excitation spectra for the 389 and 475 nm emissions of the 1D microscale perovskites.**

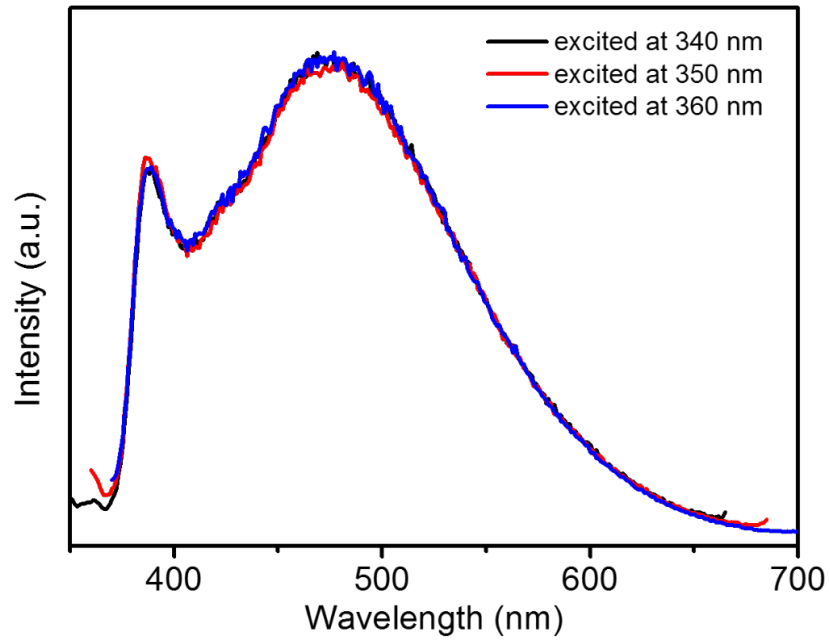

**Supplementary Figure 6 | Emission spectra of the 1D microscale perovskites at different excitation wavelengths.**

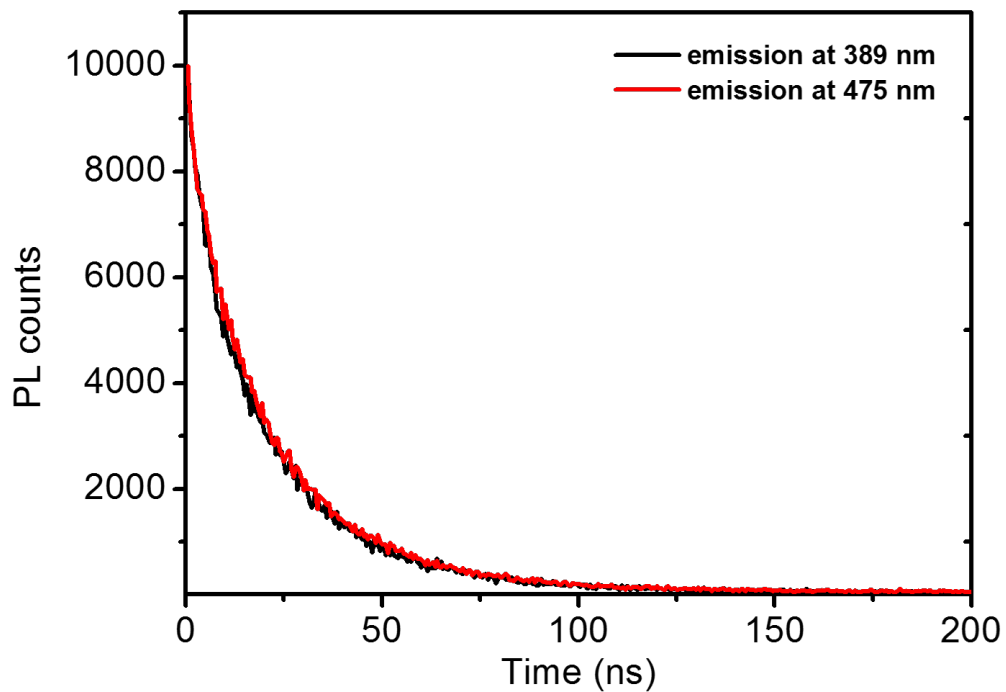

**Supplementary Figure 7 | Decay curves monitored at 389 nm and 475 nm for microscale crystals at room temperature.**

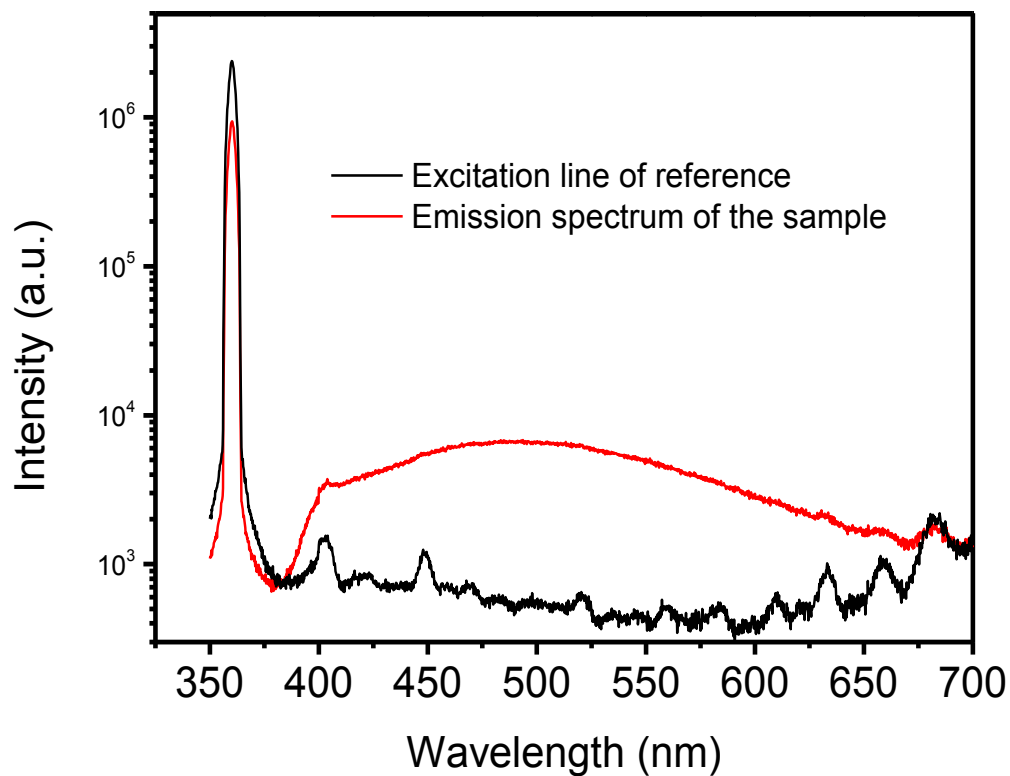

**Supplementary Figure 8 | Excitation line of reference and emission spectrum of 1D Pb bromide perovskite bulk crystals by an integrating sphere.**

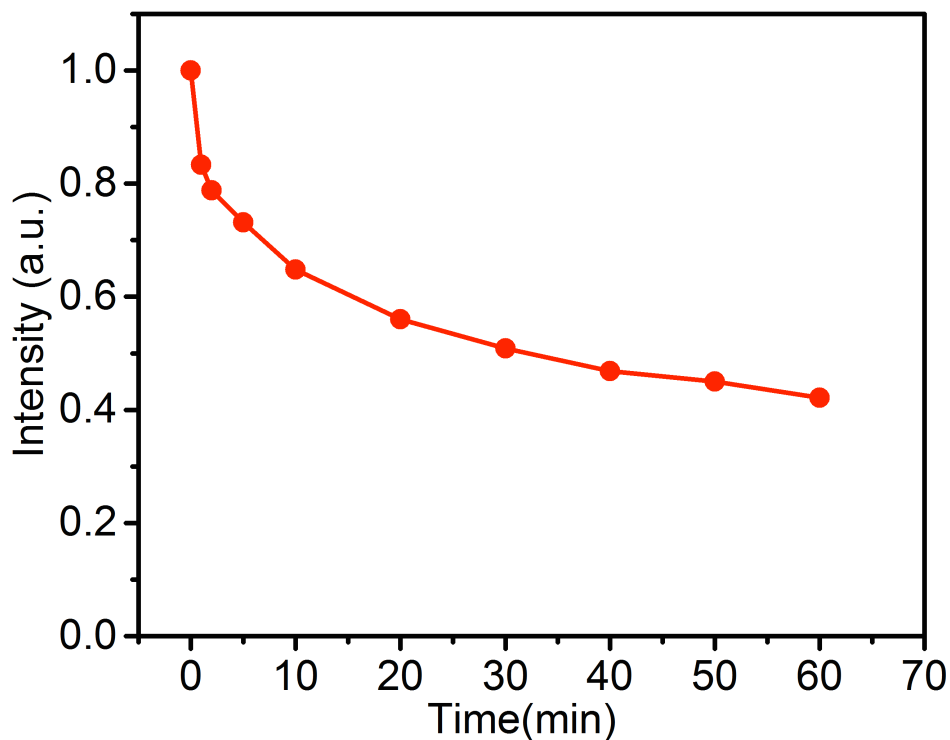

**Supplementary Figure 9 | Photoluminescence intensity changes after continuous illumination in air using Hg lamp.**

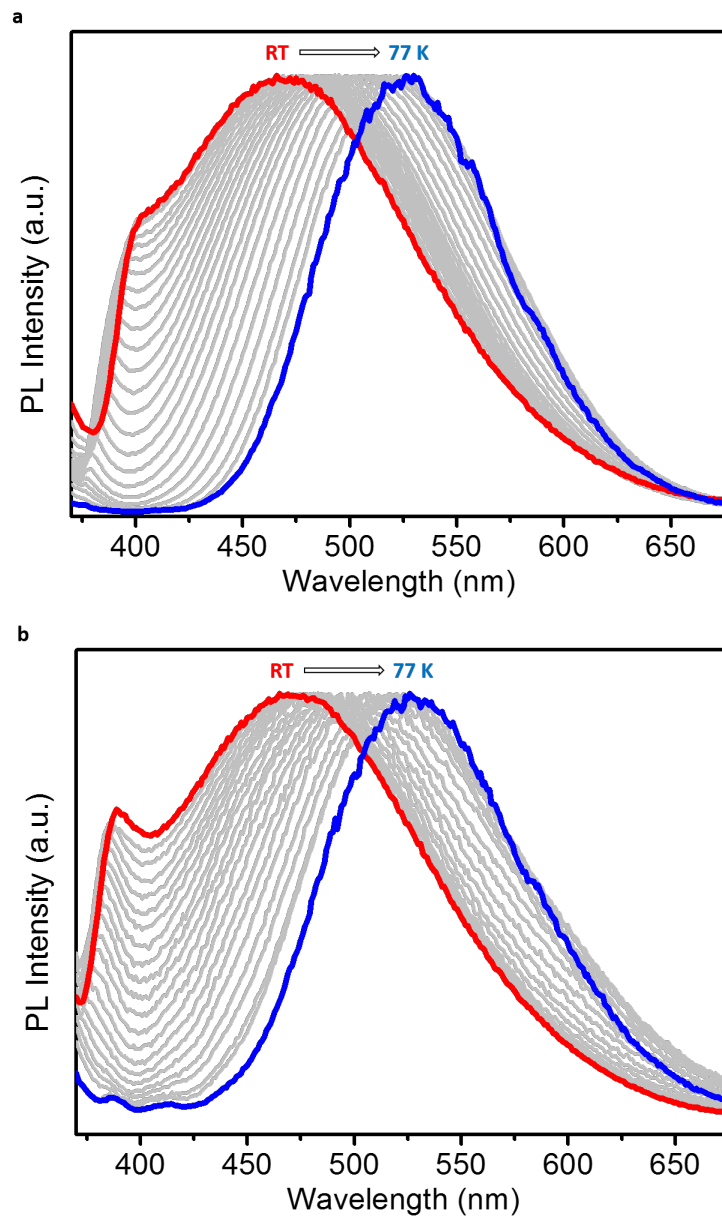

**Supplementary Figure 10 | Temperature dependent emission spectra of bulk (a) and microscale (b) crystals from room temperature to 77 K (one scan per 10 K, spectra are normalized for clarity).**
